# Supplementary material for: Ecotoxicological assessment of MWCNT-reinforced MOC composites: impacts on model bacteria and eukaryotes with environmental relevance
Source: Royal Society of Chemistry journal article supplement (doi:10.1039/d4en01088d), 2025-01-01

## SUPPORTING INFORMATION

### **Ecotoxicological Assessment of MWCNT-Reinforced MOC Composites: Impacts on Model Bacteria and Eukaryotes with Environmental Relevance**

Simona Lencova<sup>1,2</sup>, Jana Kofronova<sup>2,3</sup>, Vaclav Peroutka<sup>1</sup>, Anna-Marie Lauermannova<sup>2</sup>, Adela Jirickova<sup>2</sup>, Michal Lojka<sup>2</sup>, Ondrej Jankovsky<sup>2</sup>, Radek Vurm<sup>2</sup>

<sup>1</sup> Department of Biochemistry and Microbiology, University of Chemistry and Technology, Prague, Czech Republic

<sup>2</sup> Department of Inorganic Chemistry, University of Chemistry and Technology Prague, Czech Republic

<sup>3</sup> Department of Environmental Chemistry, University of Chemistry and Technology, Prague, Czech Republic

\*corresponding author: Simona Lencova, [lencovas@vscht.cz](mailto:lencovas@vscht.cz)

**Figure S1:** Verification of MOC-REF, MOC-MWCNT and MOC-MWCNT-ox sterility: a) spectrophotometric measurement of microbial growth after materials cultivation in TSB medium, *E. coli* served as a control; b) materials in a solid form after the cultivation in TSB medium with clear TSB medium confirming materials sterility.

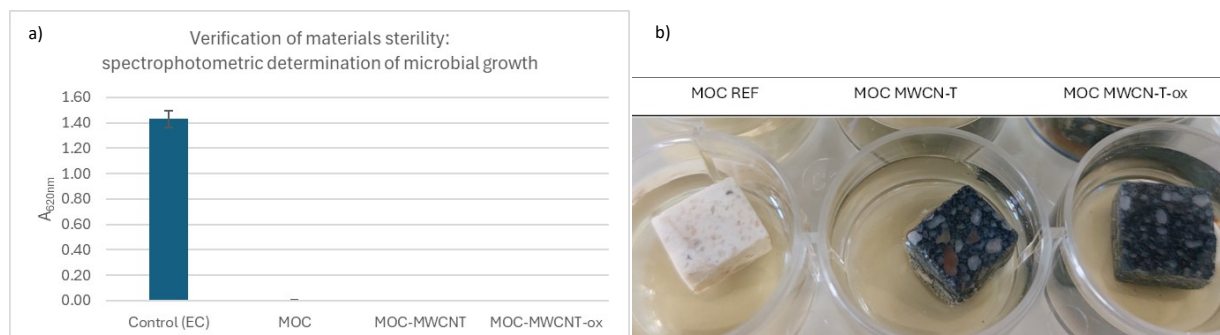

**Figure S2:** *P. aeruginosa* (PA) suspension after the incubation with MOC materials; PA did not turn blue-green at high pH, while coloured as usually in a control well.

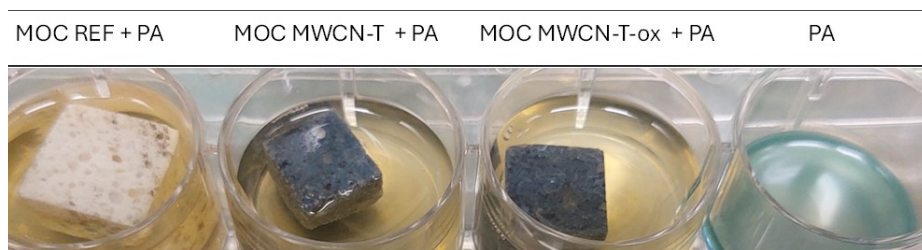

Supplement: d4en01088d1.pdf [file d4en01088d1.pdf]
